# Supplementary material for: Preoperative Cervical Lymph Node Metastasis Prediction in Papillary Thyroid Carcinoma: A Noninvasive Clinical Multimodal Radiomics (CMR) Nomogram Analysis
Source: Hindawi journal article supplement (doi:10.1155/2023/3270137), 2023-03-09
Supplement: f1 [file 3270137.f1.zip]

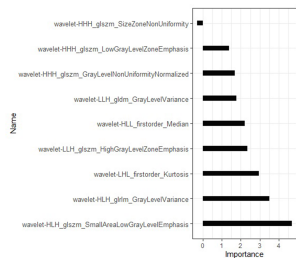

**CE-T1WI radiomics features**

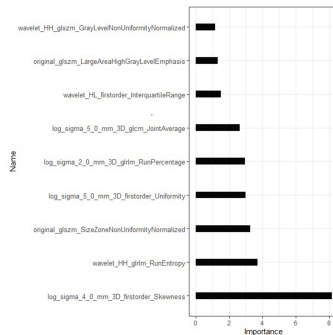

**US radiomics features**

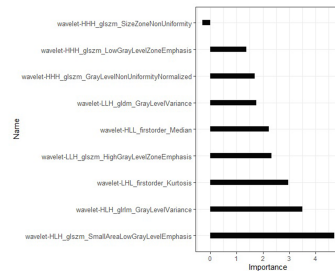

**T2WI radiomics features**

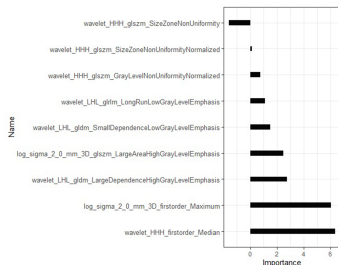

**DWI radiomics features**

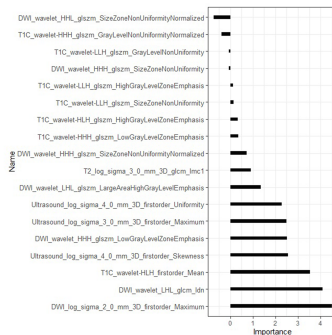

**Combined radiomics features**
