# Supplementary material for: Preoperative Cervical Lymph Node Metastasis Prediction in Papillary Thyroid Carcinoma: A Noninvasive Clinical Multimodal Radiomics (CMR) Nomogram Analysis
Source: Hindawi journal article supplement (doi:10.1155/2023/3270137), 2023-03-09
Supplement: f1 [file 3270137.f1.zip]

268 patients pathologically confirmed PTC from  
January 1, 2017 to December 31, 2021

***Excluded n=135***

No MRI exam (n=34)  
No US images (n=16)  
Tumor maximum diameter <5mm (n=19)  
Lesions with poor image quality (n=17)  
No lymph node dissection (n=23)  
With measuring lines on US image (n=21)  
Inconsistency between MRI and US (n=5)

Patients included in this study  
(n=133)

Training group  
(n = 90)

Validation group  
(n = 43)
